# Supplementary material
Source: PubMed Central journal article supplement (PMC6129429)
Supplement: NIHMS978386-supplement-1.pdf [file NIHMS978386-supplement-1.pdf]

## Sustained Stimulation of $\beta_2$ - and $\beta_3$ -adrenergic Receptors Leads to Persistent Functional Pain and Neuroinflammation

Xin Zhang MD, PhD<sup>a,b†</sup>, Jane E. Hartung PhD<sup>a,ct</sup>, Andrey V. Bortsov MD, PhD<sup>a</sup>, Seungtae Kim PhD<sup>a,d</sup>, Sandra C. O'Buckley<sup>a</sup>, Julia Kozlowski<sup>a</sup> and Andrea G. Nackley PhD<sup>a\*</sup>

### Supplementary Figures

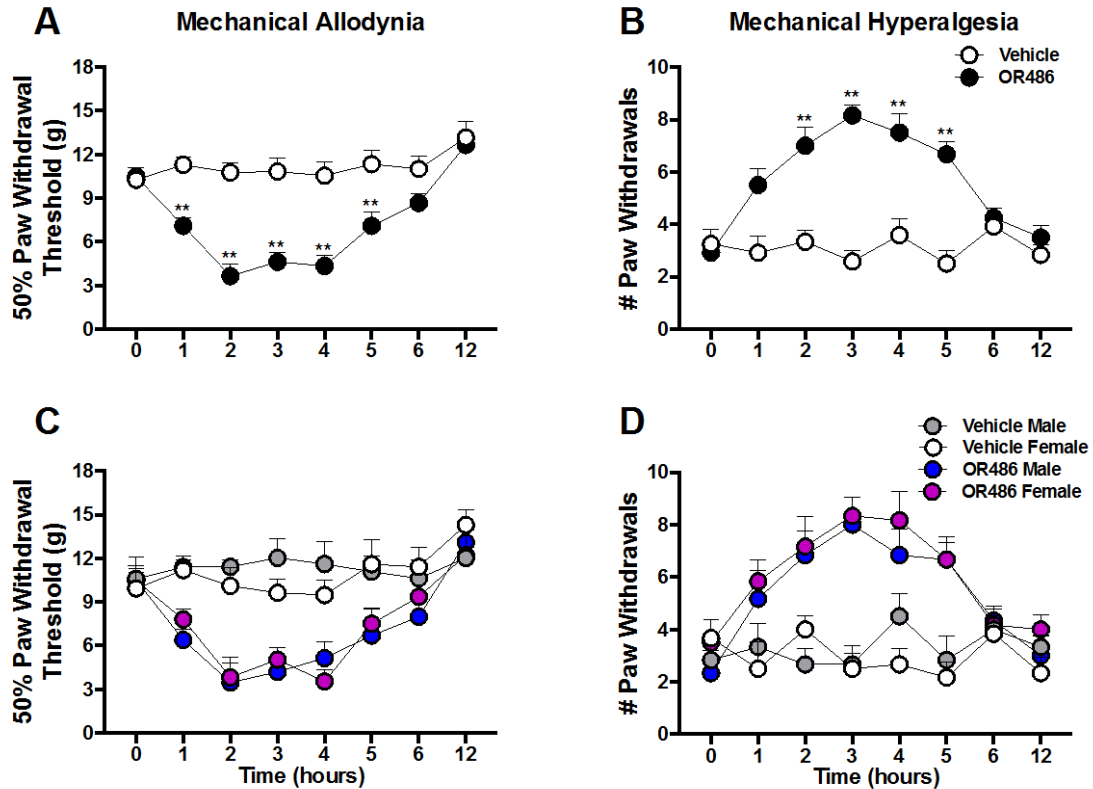

**Figure 1S. Acute COMT-dependent mechanical pain resolves after 5 hours, and is consistent between male and female rats.** Compared to vehicle, a single dose of OR486 (30mg/kg, ip) produces (A) mechanical allodynia and (B) mechanical hyperalgesia for up to 5 hours. No significant differences in (C) mechanical allodynia or (D) mechanical hyperalgesia are observed between male and female rats. N=6 (3 males + 3 females) per group. Data are mean  $\pm$  SEM. \*\* $P < 0.01$  vs vehicle.

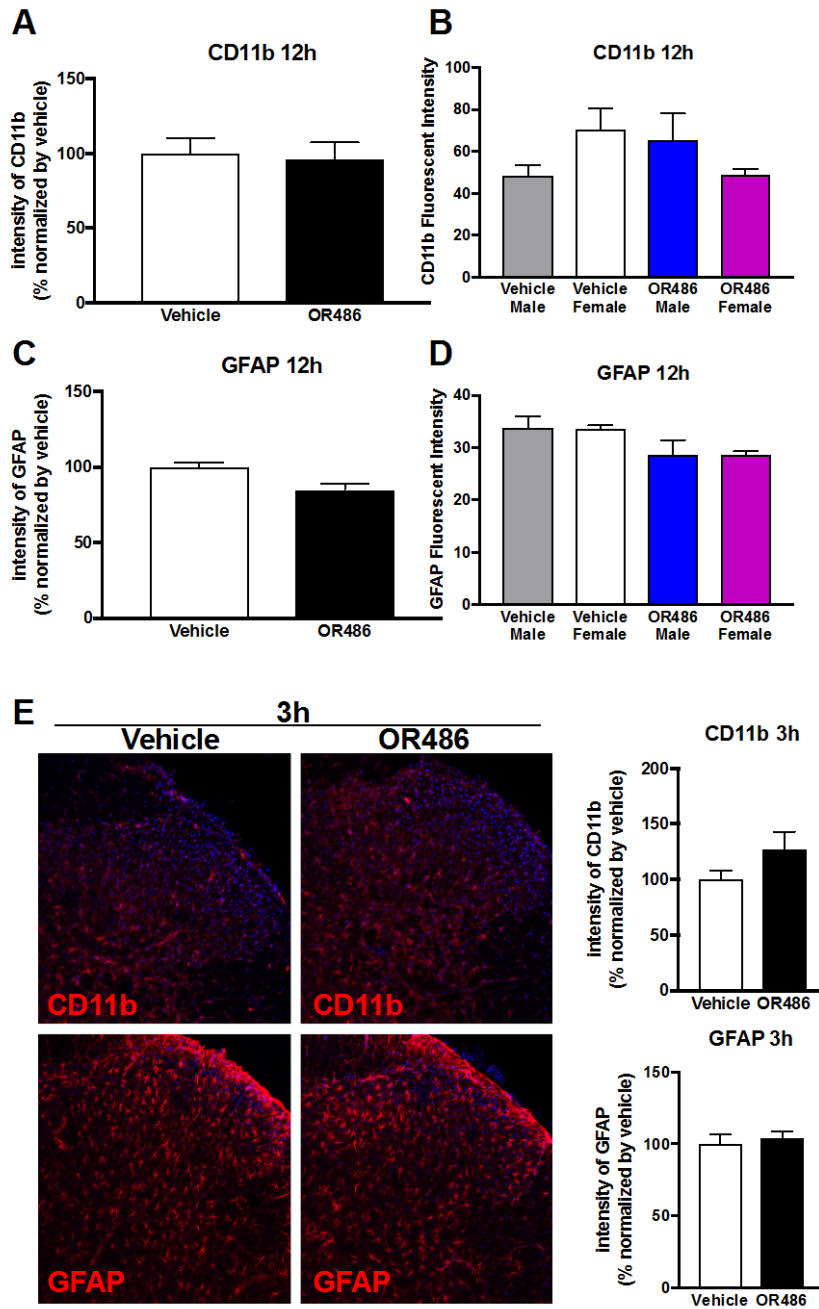

**Figure 2S. Acute OR486 delivery does not alter glial activation.** Quantitative analysis of immunofluorescence intensity demonstrates that a single dose of OR486 does not alter (A,B) microglia or (C,D) astrocyte activation at 12 hours, which is consistent between male and female rats. N=6 (3 males and 3 females) per group. Further, immunohistochemical staining and quantitative analysis of immunofluorescence intensity shows that a single dose of OR486 does not alter (E) microglia or astrocyte activation at 3 hours. N=3 males per group. Data are mean  $\pm$  SEM.

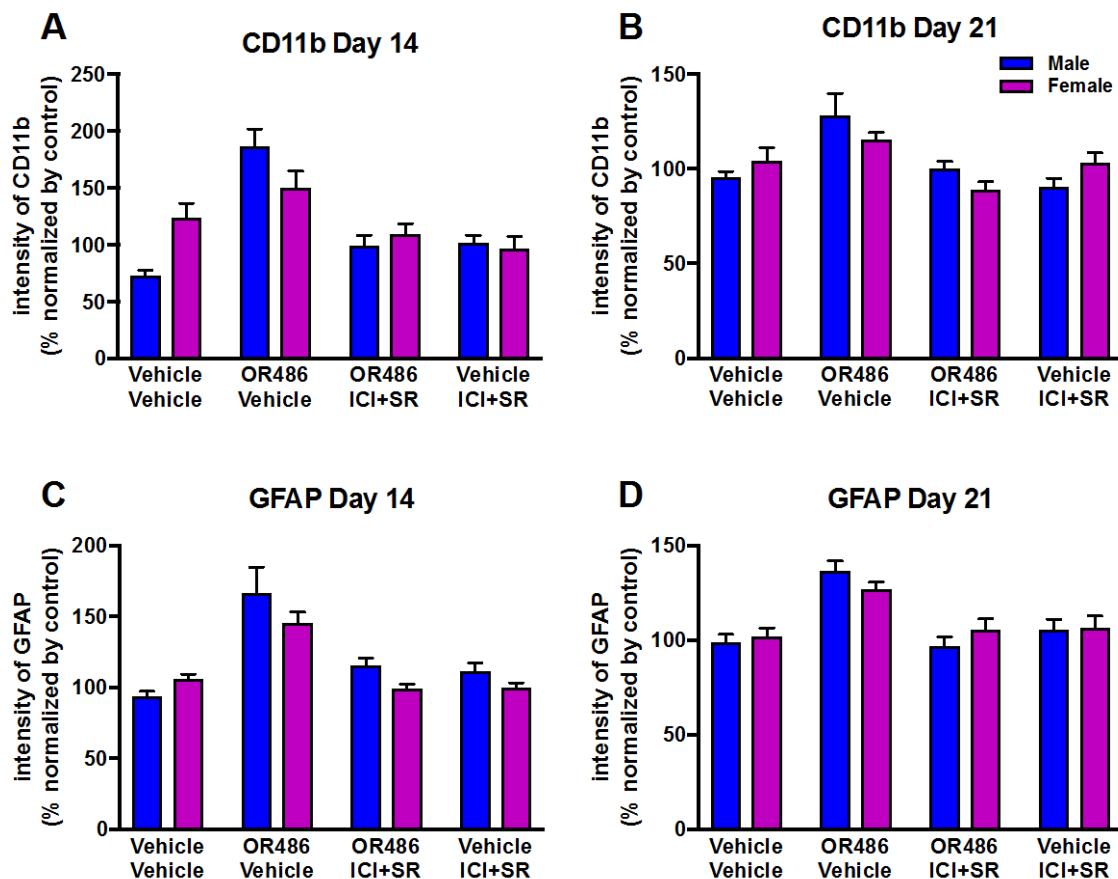

**Figure 3S. COMT-dependent glial activation is consistent between male and female rats.** Quantitative analysis of immunofluorescence intensity demonstrates that male and female rats exhibit similar levels of (A, B) microglia and (C, D) astrocyte activation following sustained 14-day systemic delivery of OR486. Day 14 groups: Vehicle/Vehicle n=5 (3 males + 2 females); OR486/Vehicle n=6 (3 males + 3 females); OR486/ICI&SR n=6 (3 males + 3 females); Vehicle/ICI&SR n=5 (3 males + 2 females). Day 21 groups: Vehicle/Vehicle n=6 (3 males + 3 females); OR486/Vehicle n=7 (4 males + 3 females); OR486/ICI&SR n=7 (4 males + 3 females); Vehicle/ICI&SR n=6 (3 males + 3 females). Data are mean  $\pm$  SEM.

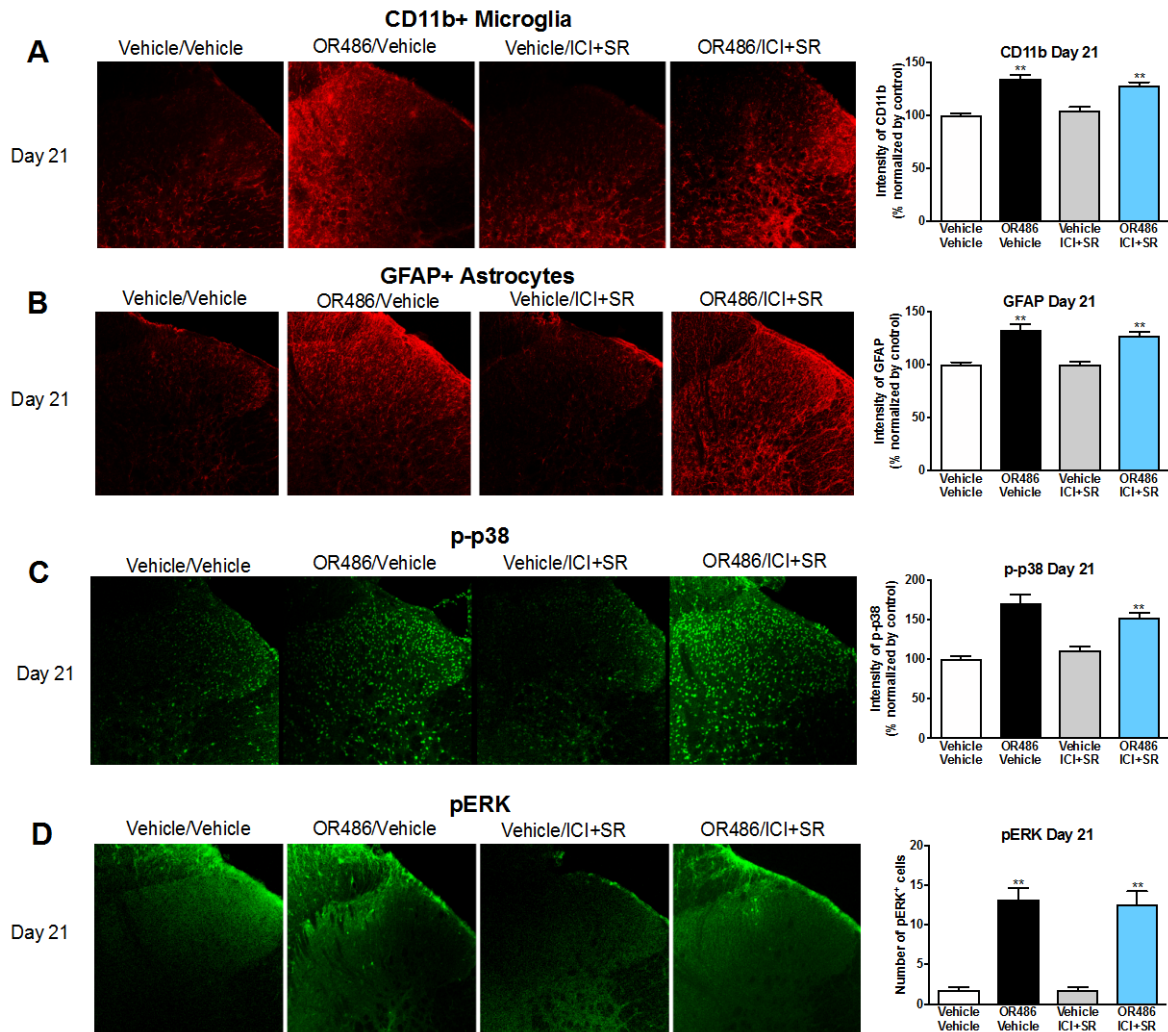

**Figure 4S. COMT-dependent glial activation and MAPK phosphorylation remain unaltered following systemic delivery of  $\beta_2$ - and  $\beta_3$ AR antagonists.** Immunohistochemical staining and quantitative analysis of immunofluorescence intensity show that systemic delivery of ICI118,551+SR59230A for 14 days beginning on day 7 does not change activation of (A) microglia, (B) astrocytes, (C) p38, and (D) ERK measured on day 21 following sustained 14-day systemic delivery of OR486 or vehicle. Vehicle/Vehicle n=6 (3 males + 3 females); OR486/Vehicle n=7 (4 males + 3 females); OR486/ICI&SR n=7 (4 males + 3 females); Vehicle/ICI&SR n=6 (3 males + 3 females). Data are mean  $\pm$  SEM. \*\* $P < 0.01$  vs vehicle/vehicle.

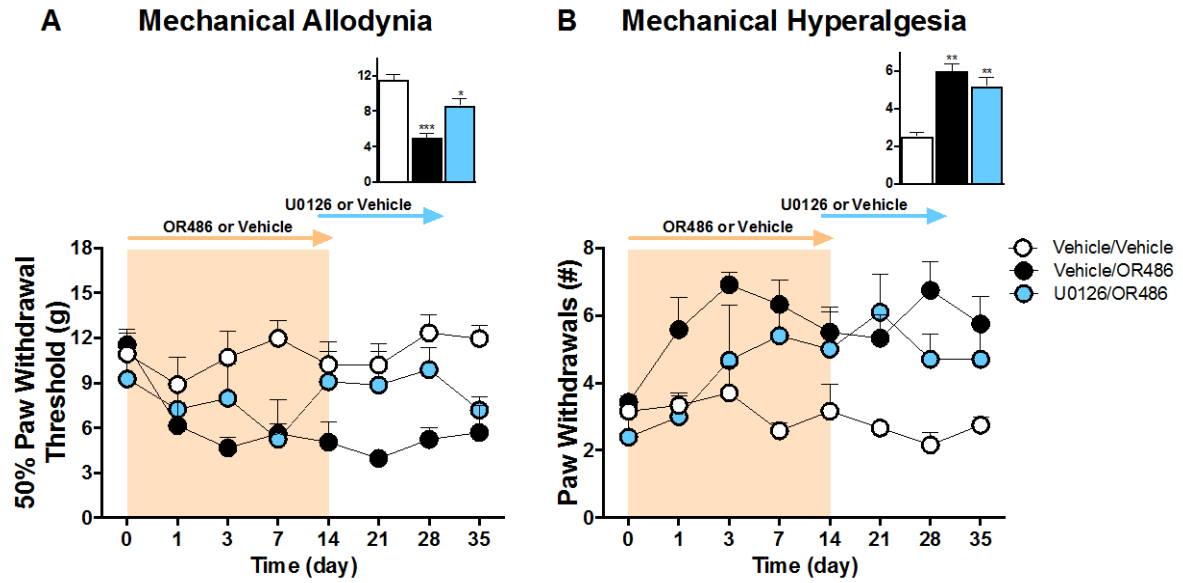

**Figure 5S. COMT-dependent hyperalgesia remains unaltered following ERK inhibition.** Intrathecal administration of the ERK inhibitor U0126 for 14 days beginning on day 14 does not reverse OR486-induced (B) mechanical hyperalgesia. Insets represent average pain behavior following inhibitor delivery on days 21-35. Vehicle/Vehicle n=7, OR486/Vehicle n=7, OR486/U0126 n=6 males per group. Data are mean  $\pm$  SEM. \*\*\* $P < 0.001$ , \*\* $P < 0.01$ , \* $P < 0.05$  vs vehicle/vehicle.

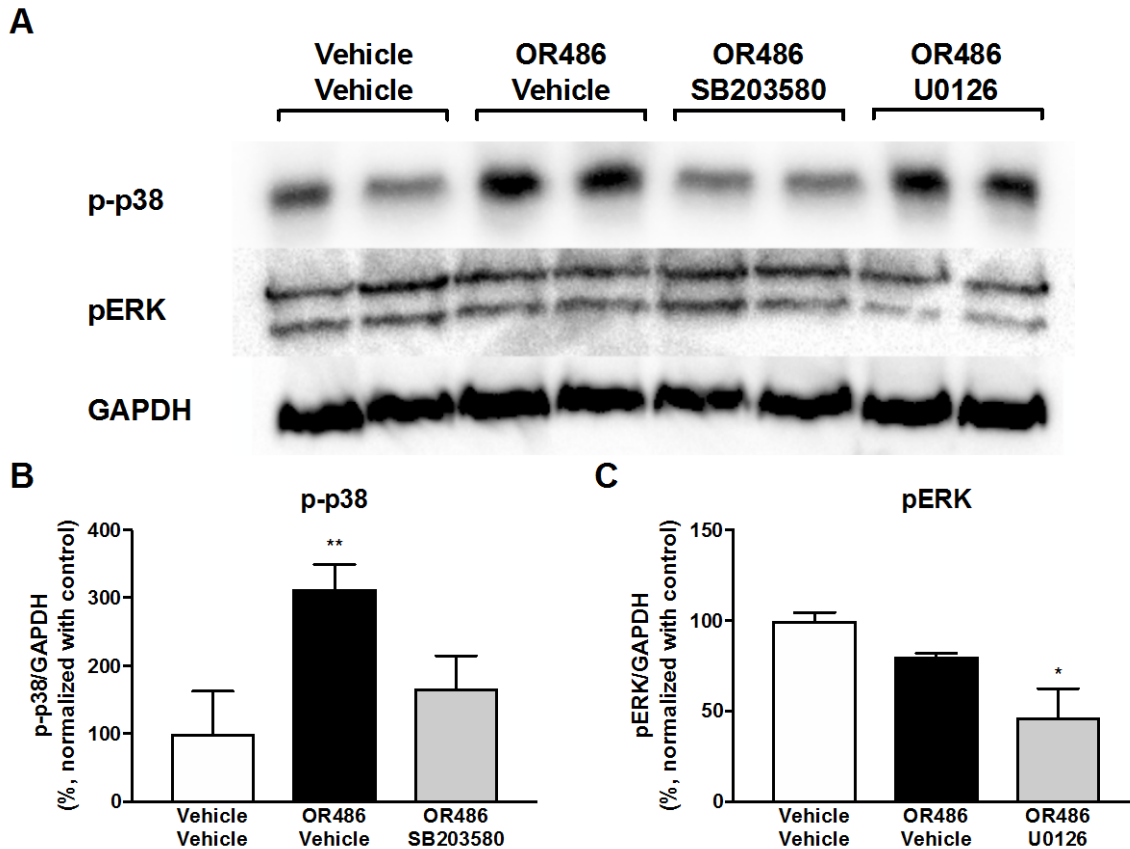

**Figure 6S. SB203580 and U0126 effectively reduce p-p38 and pERK expression in the spinal cord.** Quantitative analysis of (A) western blot bands demonstrates that (B) SB203580 delivery for 14 days beginning on day 14 reduces sustained OR486-induced increases in spinal p-p38 expression measured on day 35. (C) Similarly, U0126 delivery for 14 days beginning on day 14 reduces spinal pERK expression measured on day 35. N=4 males per group. Data are mean  $\pm$  SEM, \* $P$  < 0.05, \*\* $P$  < 0.01 vs vehicle/vehicle.
